# Supplementary material for: Tri-functional Fe–Zr bi-metal–organic frameworks enable high-performance phosphate ion ratiometric fluorescent detection
Source: Royal Society of Chemistry journal article supplement (doi:10.1039/d0nr04531d), 2020-01-01
Supplement: d0nr04531d1.pdf [file d0nr04531d1.pdf]

Electronic Supplementary Information (ESI) for

# **Tri-functional Fe-Zr bi-metal–organic frameworks enable high-performance phosphate ion ratiometric fluorescent detection**

Xin Li,<sup>a,b,c,#</sup> Peng Liu,<sup>a,#</sup> Xiangheng Niu,<sup>a,b,\*</sup> Kun Ye,<sup>a</sup> Liang Ni,<sup>a</sup> Dan Du,<sup>b</sup> Jianming Pan,<sup>a</sup> Yuehe Lin<sup>b,\*</sup>

<sup>a</sup> Institute of Green Chemistry and Chemical Technology, School of Chemistry and Chemical Engineering, Jiangsu University, Zhenjiang 212013, PR China

<sup>b</sup> School of Mechanical and Materials Engineering, Washington State University, Pullman, WA 99164, USA

<sup>c</sup> School of Environment and Safety Engineering, Jiangsu University, Zhenjiang 212013, PR China

# Authors who contribute to the work equally

\* Corresponding authors. E-mail: niuxiangheng@ujs.edu.cn (X. Niu); yuehe.lin@wsu.edu (Y. Lin)

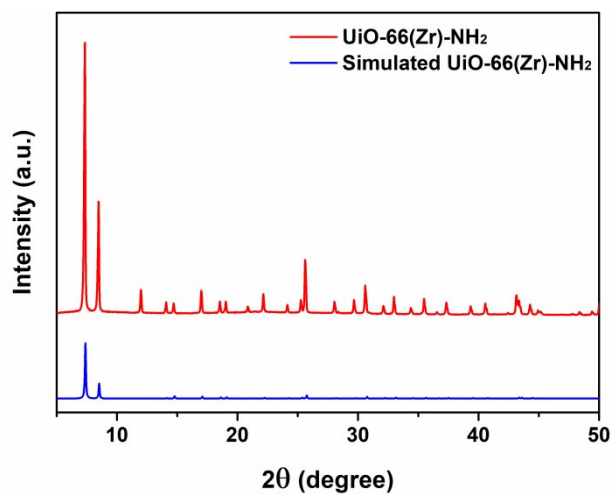

**Figure S1.** XRD pattern of UiO-66(Zr)-NH<sub>2</sub>.

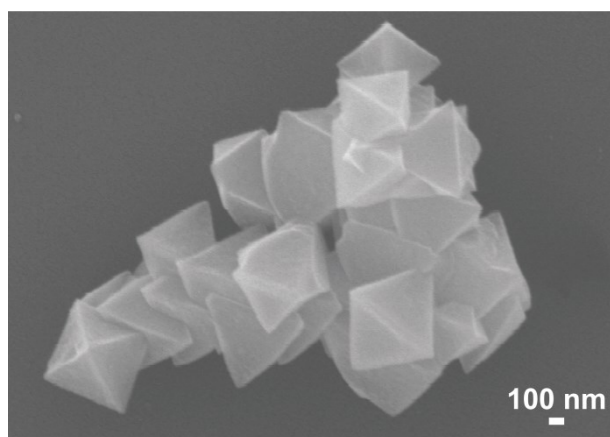

**Figure S2.** SEM image of UiO-66(Zr)-NH<sub>2</sub>.

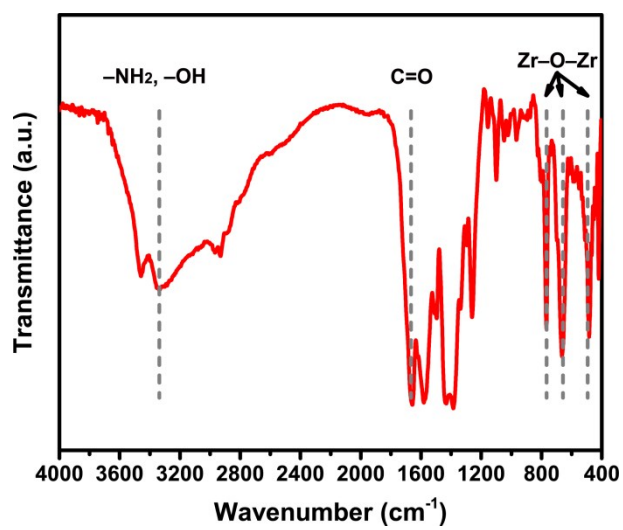

**Figure S3.** FTIR spectrum of UiO-66(Zr)-NH<sub>2</sub>.

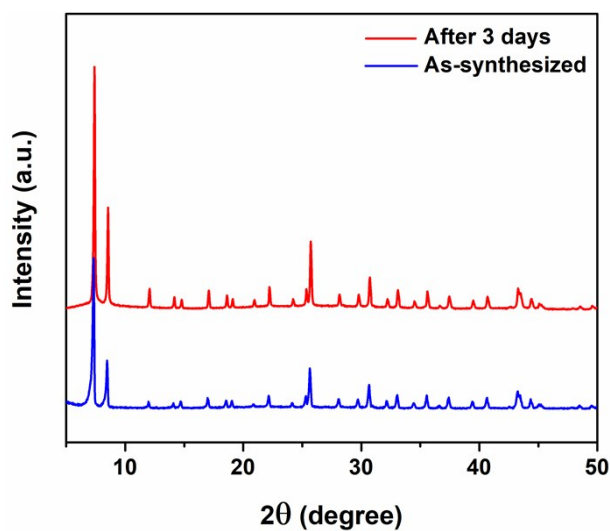

**Figure S4.** XRD pattern of UiO-66(Fe/Zr)-NH<sub>2</sub> after suspension in NaAc-HAc buffer (pH 4.0) for three days.

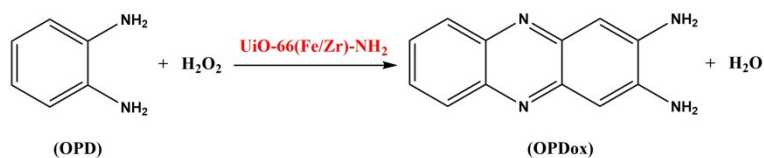

**Figure S5.** H<sub>2</sub>O<sub>2</sub>-assisted oxidation of OPD to OPDox under the peroxidase-mimetic catalysis of UiO-66(Fe/Zr)-NH<sub>2</sub>.

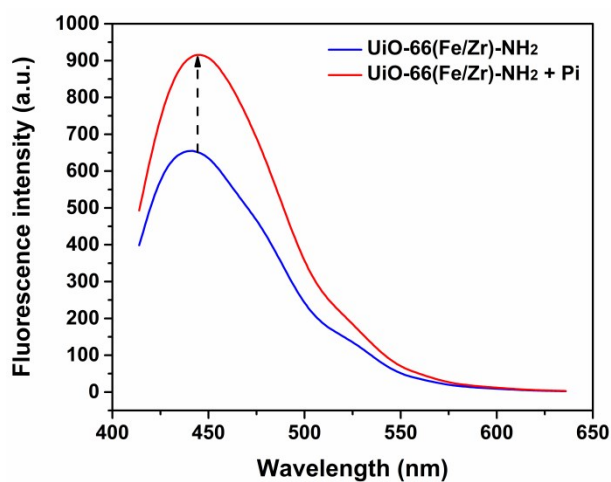

**Figure S6.** Impact of Pi on the intrinsic fluorescent property of UiO-66(Fe/Zr)-NH<sub>2</sub>.

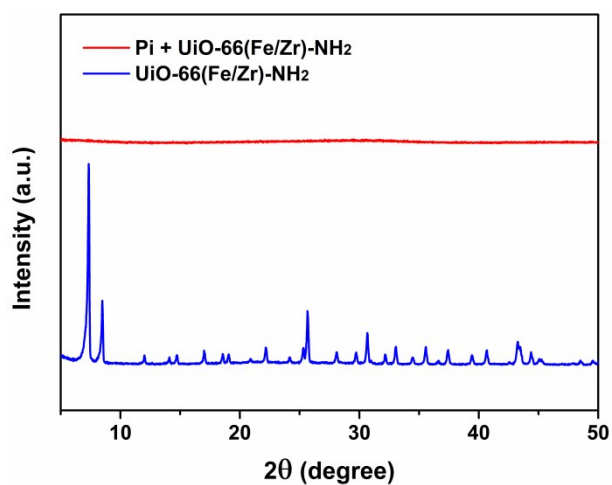

**Figure S7.** XRD comparison of UiO-66(Fe/Zr)-NH<sub>2</sub> before and after Pi adsorption.

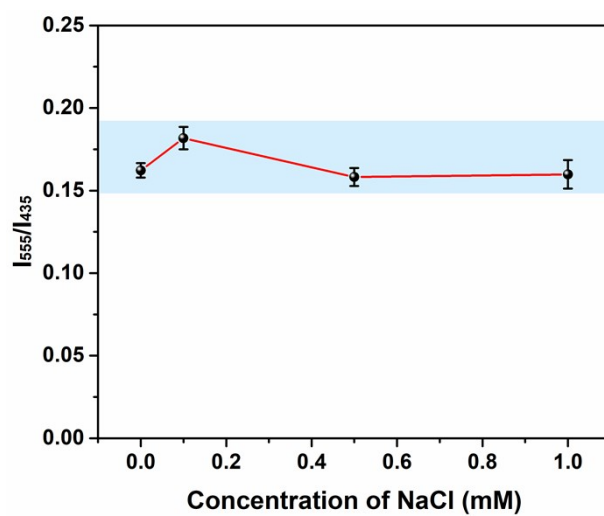

**Figure S8.** Influence of ionic strength on the I<sub>555</sub>/I<sub>435</sub> value of the UiO-66(Fe/Zr)-NH<sub>2</sub>+H<sub>2</sub>O<sub>2</sub>+OPD+Pi system (Pi concentration: 0.33 mM).

**Table S1.** Performance comparison of our sensing platform with other methods for Pi detection.

| <b>Material</b>              | <b>Function</b>                                                  | <b>Measurement method</b> | <b>Detection range<br/>(<math>\mu\text{M}</math>)</b> | <b>LOD<br/>(<math>\mu\text{M}</math>)</b> | <b>Ref.</b>  |
|------------------------------|------------------------------------------------------------------|---------------------------|-------------------------------------------------------|-------------------------------------------|--------------|
| $\text{Fe}_3\text{O}_4$ MNPs | Peroxidase mimic                                                 | Colorimetric              | 0.2–200                                               | 0.11                                      | [1]          |
| UiO-66(Zr)- $\text{NH}_2$    | Fluorescent label                                                | Fluorescent               | 5–150                                                 | 1.25                                      | [2]          |
| CBNPs                        | Electrode modifier                                               | Electrochemical           | Up to 80                                              | 6                                         | [3]          |
| GODs                         | Fluorescent label                                                | Fluorescent               | 0.5–190                                               | 0.1                                       | [4]          |
| Mn-ZnS-QDs                   | Phosphorescent label                                             | Phosphorescent            | 8–320                                                 | 2.71                                      | [5]          |
| s-GQDs                       | Fluorescent label                                                | Fluorescent               | 0.25–7.5                                              | 0.1                                       | [6]          |
| UiO-66(Fe/Zr)- $\text{NH}_2$ | Recognition motif,<br>fluorescent label, and<br>peroxidase mimic | Ratiometric fluorescent   | 0.2–266.7                                             | 0.085                                     | This<br>work |

**Table S2.** Results of our sensing platform for Pi determination in real samples.

| Sample         | Pi in original samples                          |                          | Pi in spiked samples                            |       | Recovery rate (%) |
|----------------|-------------------------------------------------|--------------------------|-------------------------------------------------|-------|-------------------|
|                | detected by our sensor ( $\mu\text{M}$ , N = 3) | Spiked ( $\mu\text{M}$ ) | detected by our sensor ( $\mu\text{M}$ , N = 3) |       |                   |
| Drinking water | Not detected                                    | 33.3                     | 34.6                                            | 103.9 |                   |
|                |                                                 | 133.3                    | 136.2                                           | 102.2 |                   |
|                |                                                 | 200.0                    | 203.9                                           | 102.0 |                   |
| Tap water      | Not detected                                    | 33.3                     | 34.0                                            | 102.1 |                   |
|                |                                                 | 133.3                    | 132.3                                           | 99.2  |                   |
|                |                                                 | 200.0                    | 203.8                                           | 101.9 |                   |
| River water 1# | Not detected                                    | 66.7                     | 65.8                                            | 98.6  |                   |
|                |                                                 | 133.3                    | 137.1                                           | 102.8 |                   |
|                |                                                 | 200.0                    | 195.9                                           | 98.0  |                   |
| River water 2# | 19.4                                            | 66.7                     | 86.7                                            | 100.9 |                   |
|                |                                                 | 100.0                    | 116.6                                           | 97.2  |                   |
|                |                                                 | 133.3                    | 157.1                                           | 103.3 |                   |
| River water 3# | 98.0                                            | 33.3                     | 136.9                                           | 116.8 |                   |
|                |                                                 | 66.7                     | 161.8                                           | 95.6  |                   |
|                |                                                 | 100.0                    | 196.5                                           | 98.5  |                   |

## References

- [1] C.X. Chen, L.X. Lu, Y. Zheng, D. Zhao, F. Yang, X.R. Yang, A new colorimetric protocol for selective detection of phosphate based on the inhibition of peroxidase-like activity of magnetite nanoparticles, *Anal. Methods*, 7 (2015) 161-167.
- [2] J. Yang, Y. Dai, X.Y. Zhu, Z. Wang, Y.S. Li, Q.X. Zhuang, J.L. Shi, J.L. Gu, Metal-organic frameworks with inherent recognition sites for selective phosphate sensing through their coordination-induced fluorescence enhancement effect, *J. Mater. Chem. A*, 3 (2015) 7445-7452.
- [3] D. Talarico, S. Cinti, F. Arduini, A. Amine, D. Moscone, G. Palleschi, Phosphate detection through a cost-effective carbon black nanoparticle-modified screen-printed electrode embedded in a continuous flow system, *Environ. Sci. Technol.*, 49 (2015) 7934-7939.
- [4] J.M. Bai, L. Zhang, R.P. Liang, J.D. Qiu, Graphene quantum dots combined with europium ions as photoluminescent probes for phosphate sensing, *Chem. Eur. J.*, 19 (2013) 3822-3826.
- [5] J. Qin, D.X. Li, Y.M. Miao, G.Q. Yan, Detection of phosphate based on phosphorescence of Mn doped ZnS quantum dots combined with cerium(III), *RSC Adv.*, 7 (2017) 46657-46664.
- [6] B.B. Chen, R.S. Li, M.L. Liu, H.Y. Zou, H. Liu, C.Z. Huang, Highly selective detection of phosphate ion based on a single-layered graphene quantum dots- $\text{Al}^{3+}$  strategy, *Talanta*, 178 (2018) 172-177.
